# Supplementary material for: Conformational adaptation and large amplitude motions of 1-phenyl-2,2,2-trifluoroethanol with two water molecules: a rotational spectroscopic and ab initio investigation
Source: Royal Society of Chemistry journal article supplement (doi:10.1039/d4cp01516a), 2024-01-01
Supplement: d4cp01516a1.pdf [file d4cp01516a1.pdf]

## Electronic Supporting Information

### Conformational Adaptation and Large Amplitude Motions of 1-Phenyl-2,2,2-Trifluoroethanol with Two Water Molecules: A Rotational Spectroscopic and Ab Initio Investigation

Colton D. Carlson,<sup>1</sup> Jiarui Ma,<sup>1</sup> Mohamed Al-Jabiri,<sup>1</sup> Aran Insausti,<sup>1,2,3</sup> and Yunjie Xu\*<sup>1</sup>

<sup>1</sup> Department of Chemistry, University of Alberta, Edmonton, AB, T6G 2G2, Canada.

<sup>2</sup> Departamento de Química Física, Facultad de Ciencia y Tecnología, Universidad del País Vasco (UPV-EHU), 48080 Bilbao, Spain.

<sup>3</sup> Biofisika Institute (CSIC, UPV/EHU), University of the Basque Country (UPV/EHU), 48940 Leioa, Spain

\* Corresponding Author, Email: yunjie.xu@ualberta.ca. Fax: 780-492-8231

#### Contents

|                                                                                                                                                                                                                                                                                        |         |
|----------------------------------------------------------------------------------------------------------------------------------------------------------------------------------------------------------------------------------------------------------------------------------------|---------|
| <b>Table S1.</b> Structural and Energetic parameters for the computationally identified PhTFE⋯2H <sub>2</sub> O conformers.....                                                                                                                                                        | S2-S3   |
| <b>Figure S1.</b> A zoom-in section of the rotational spectrum showing the <i>ortho-para</i> splitting in the 2 <sub>0,2</sub> → 1 <sub>0,1</sub> a-type transition of II-2W-1/2/3.....                                                                                                | S3      |
| <b>Table S2.1-2.13.</b> Rotational transition frequencies and assignments of II-2W-1/2/3 and its deuterated and oxygen-18 isotopologues.....                                                                                                                                           | S4-S17  |
| <b>Table S3.1-3.2.</b> Experimental rotational constants and transition frequencies assignments for PhTFE(OH) II – DOD .....                                                                                                                                                           | S18-S19 |
| <b>Table S4.</b> Predicted rotational and quartic centrifugal distortion constants for II-2W-1, II-2W-2, and II-2W-3 calculated at the B3LYP-D3BJ/def2-TZVPPD level of theory along with the experimental constants for II-2W-1/2/3.....                                               | S19     |
| <b>Table S5.</b> Comparison of the calculated cartesian coordinates in the principal axis system for II-2W-1, II-2W-2, and II-2W-3 with the experimental coordinates for II-2W-1/2/3 obtained from the single isotopic substitution analysis for the multiply substituted species..... | S20     |
| <b>Figure S2.</b> Comparison of two PhTFE⋯2H <sub>2</sub> O conformers displaying a slight or significantly distortion of the PhTFE subunit relative to the monomeric structure.....                                                                                                   | S21     |
| <b>Figure S3.</b> NCI analyses for selected PhTFE monomer and monohydrate conformers.....                                                                                                                                                                                              | S21     |

**Table S1.** Raw ( $\Delta E_e$ ), ZPE-corrected ( $\Delta E_{0,a}$ ), and ZPE+BSSE-corrected ( $\Delta E_{0,b}$ ) relative energies (in kJ mol<sup>-1</sup>), rotational constants (in MHz), dipole moment components (in Debye), and the C<sub>benzene</sub>COH torsion,  $\tau$  (in degrees, 0 to 360), for the PhTFE subunit in the computationally identified PhTFE...2H<sub>2</sub>O conformers calculated at the B3LYP-D3BJ/def2-TZVPPD level of theory.

| Structure <sup>a</sup> | $\tau$ (CCOH)<br>deg. | Energies (kJ mol <sup>-1</sup> ) |                  |                  | Dip. Mom. (D) |         |         | Rot. Const. (MHz) |     |     |
|------------------------|-----------------------|----------------------------------|------------------|------------------|---------------|---------|---------|-------------------|-----|-----|
|                        |                       | $\Delta E_e$                     | $\Delta E_{0,a}$ | $\Delta E_{0,b}$ | $\mu_a$       | $\mu_b$ | $\mu_c$ | A                 | B   | C   |
| II-2W-1                | 167                   | 0.0                              | 0.0              | 0.0              | -5.1          | -0.3    | -1.3    | 853               | 469 | 364 |
| II-2W-2                | 170                   | 0.8                              | 0.4              | 0.4              | -5.2          | -0.4    | -1.2    | 857               | 465 | 366 |
| II-2W-3                | 164                   | 0.8                              | 0.4              | 0.4              | -4.9          | 0.0     | -0.2    | 865               | 468 | 369 |
| III-2W-4               | 277                   | 2.6                              | 4.5              | 4.4              | 1.3           | 0.9     | 0.3     | 940               | 444 | 356 |
| II-2W-5                | 195                   | 2.7                              | 4.4              | 4.4              | -2.4          | 0.4     | 0.2     | 699               | 545 | 383 |
| I-2W-6                 | 94                    | 3.1                              | 4.0              | 3.9              | 1.5           | 2.5     | 1.2     | 676               | 518 | 356 |
| II-2W-7                | 153                   | 3.4                              | 4.4              | 4.2              | 0.2           | 2.0     | 1.0     | 851               | 418 | 335 |
| III-2W-8               | 298                   | 3.6                              | 5.9              | 5.9              | -2.7          | 0.1     | -0.1    | 721               | 536 | 388 |
| I-2W-9                 | 76                    | 4.2                              | 4.8              | 4.6              | 0.1           | 2.9     | -0.7    | 717               | 472 | 338 |
| I-2W-10                | 81                    | 4.2                              | 5.4              | 5.4              | 0.5           | 0.8     | 0.8     | 1036              | 388 | 346 |
| I-2W-11                | 69                    | 4.5                              | 5.4              | 5.2              | 0.7           | 2.5     | 1.2     | 745               | 461 | 339 |
| I-2W-12                | 73                    | 5.2                              | 6.3              | 6.2              | 0.7           | -1.5    | -0.3    | 1020              | 398 | 346 |
| III-2W-13              | 293                   | 5.3                              | 6.7              | 6.7              | 0.8           | 0.7     | 1.0     | 926               | 429 | 348 |
| II-2W-14               | 176                   | 5.4                              | 6.1              | 5.9              | 0.5           | 2.2     | 1.2     | 751               | 453 | 335 |
| I-2W-15                | 63                    | 5.5                              | 6.5              | 6.3              | 1.1           | 1.1     | 0.6     | 906               | 413 | 338 |
| aIII-2W-16             | 288                   | 5.5                              | 7.0              | 7.1              | -2.5          | -0.8    | 1.0     | 871               | 516 | 439 |
| III-2W-17              | 292                   | 5.6                              | 7.1              | 7.0              | 1.0           | -1.2    | -0.9    | 975               | 431 | 350 |
| III-2W-18              | 298                   | 6.0                              | 7.4              | 7.3              | 0.1           | 2.1     | 1.2     | 635               | 549 | 368 |
| II-2W-19               | 201                   | 6.6                              | 6.8              | 6.7              | 1.8           | 1.4     | 0.3     | 682               | 546 | 369 |
| aIII-2W-20             | 283                   | 7.1                              | 7.6              | 7.6              | -4.6          | -1.1    | 0.7     | 904               | 464 | 397 |
| aIII-2W-21             | 263                   | 7.4                              | 9.2              | 9.1              | -3.0          | -0.1    | -1.3    | 678               | 518 | 380 |
| aIII-2W-22             | 292                   | 8.4                              | 8.6              | 8.7              | -3.7          | -0.3    | 0.3     | 869               | 513 | 437 |
| III-2W-23              | 305                   | 8.9                              | 9.6              | 9.5              | 1.8           | 1.9     | 0.5     | 642               | 552 | 364 |
| I-2W-24                | 94                    | 9.0                              | 8.3              | 8.1              | -2.0          | 0.6     | 2.4     | 1057              | 357 | 330 |
| I-2W-25                | 89                    | 9.1                              | 8.2              | 8.0              | -0.8          | 0.1     | 0.7     | 1164              | 346 | 315 |
| I-2W-26                | 62                    | 10.0                             | 10.0             | 10.0             | -1.7          | 0.4     | 0.3     | 713               | 519 | 400 |
| III-2W-27              | 290                   | 10.4                             | 10.1             | 10.0             | -0.3          | 1.6     | -1.7    | 864               | 446 | 356 |
| aIII-2W-28             | 284                   | 14.2                             | 14.3             | 14.2             | -2.7          | 0.4     | 1.8     | 637               | 531 | 374 |
| aIII-2W-29             | 268                   | 14.4                             | 13.8             | 13.7             | 0.6           | 0.8     | -1.2    | 658               | 507 | 362 |
| aIII-2W-30             | 273                   | 17.1                             | 16.2             | 16.2             | 1.9           | -1.8    | -1.5    | 728               | 499 | 411 |
| I-2W-31                | 54                    | 19.3                             | 18.0             | 17.8             | 0.5           | -0.9    | -2.8    | 710               | 476 | 357 |
| II-2W-32               | 178                   | 19.4                             | 16.8             | 16.8             | -5.2          | 1.7     | 1.6     | 734               | 510 | 400 |

|            |     |      |      |      |      |      |      |     |     |     |
|------------|-----|------|------|------|------|------|------|-----|-----|-----|
| I-2W-33    | 79  | 21.5 | 18.9 | 18.7 | -2.5 | 1.6  | -1.6 | 928 | 397 | 359 |
| II-2W-34   | 196 | 21.7 | 19.9 | 19.9 | -5.6 | -1.2 | -3.5 | 729 | 530 | 390 |
| I-2W-35    | 58  | 22.5 | 20.7 | 20.7 | -1.7 | -2.5 | 1.5  | 877 | 452 | 368 |
| aIII-2W-36 | 282 | 22.9 | 20.6 | 20.5 | 0.4  | -1.2 | 3.1  | 697 | 480 | 412 |
| I-2W-37    | 69  | 23.0 | 21.5 | 21.3 | 1.2  | -1.7 | -2.0 | 643 | 552 | 344 |
| I-2W-38    | 57  | 23.2 | 21.0 | 21.0 | -1.7 | -2.3 | -0.4 | 904 | 445 | 366 |

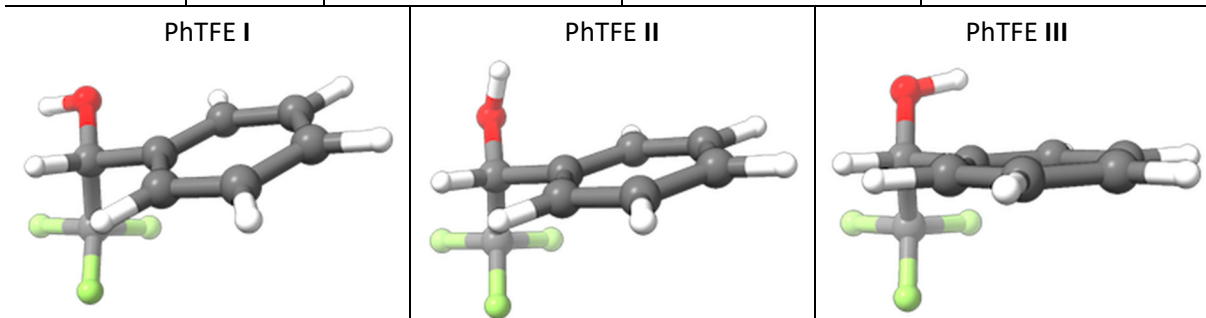

<sup>a</sup> Structures containing an “a” prior to the Roman numerals describing the configuration of the PhTFE subunit are highly distorted from its free, isolated form. In the isolated PhTFE monomers,  $\tau$  has values of 57, 169, and 277 degrees for PhTFE I, II, and III, respectively. The optimized PhTFE monomer structures are provided at the bottom.

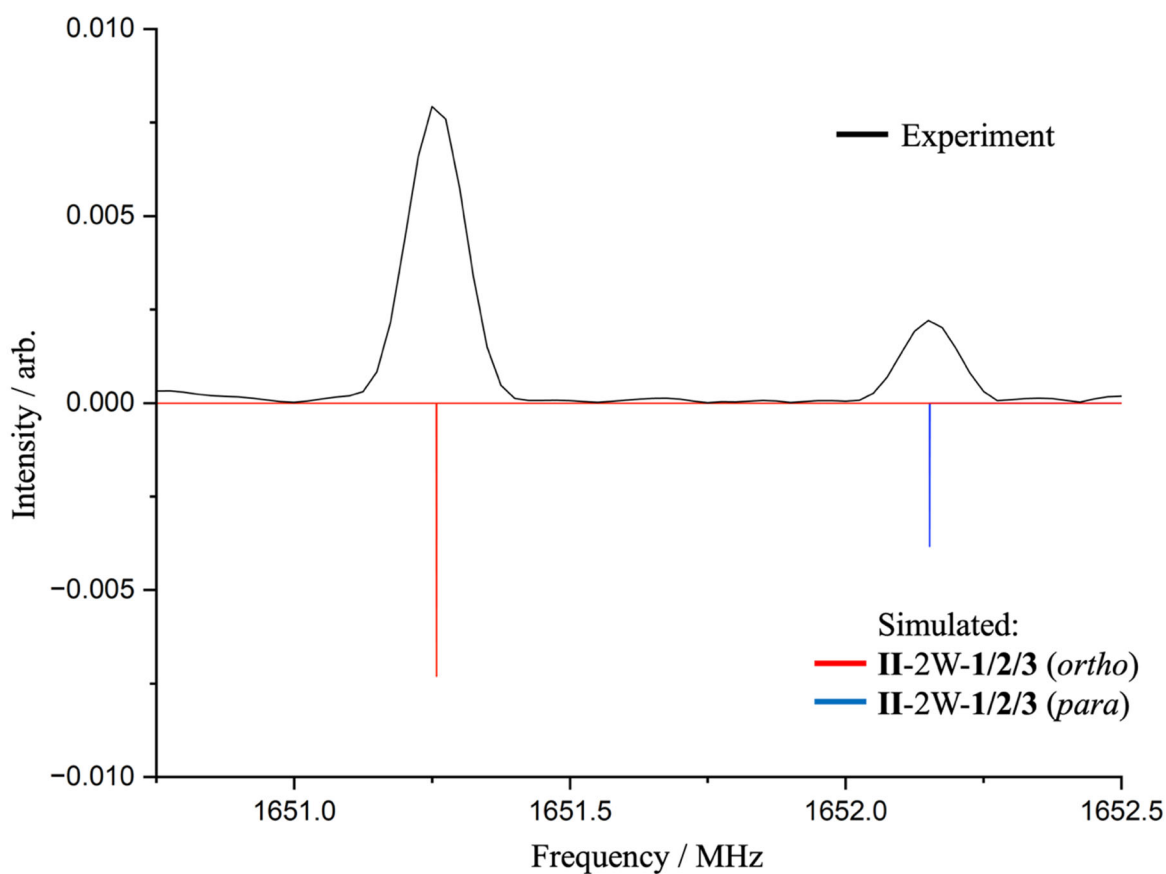

**Figure S1.** A zoom-in section of the rotational spectrum showing the *ortho-para* splitting in the  $2_{0,2} \rightarrow 1_{0,1}$  *a*-type transition of II-2W-1/2/3.

**Table S2.1.**  $\Pi$ -2W-1/2/3 (*ortho*) assigned transitions, along with their frequencies and deviation from the calculated value ( $\Delta\nu = \nu - \nu_{\text{calc}}$ ).

| $J$ | $K_a$ | $K_c$ | $J'$ | $K_a'$ | $K_c'$ | $\nu$ / MHz | $\Delta\nu$ / MHz |
|-----|-------|-------|------|--------|--------|-------------|-------------------|
| 2   | 1     | 2     | 1    | 1      | 1      | 1567.9128   | -0.0007           |
| 2   | 0     | 2     | 1    | 0      | 1      | 1651.2583   | 0.0003            |
| 2   | 1     | 1     | 1    | 1      | 0      | 1769.3029   | 0.0001            |
| 2   | 1     | 1     | 1    | 0      | 1      | 2253.6248   | 0.0031            |
| 3   | 1     | 3     | 2    | 1      | 2      | 2341.8214   | 0.0014            |
| 3   | 0     | 3     | 2    | 0      | 2      | 2436.6675   | -0.0014           |
| 3   | 2     | 1     | 2    | 2      | 0      | 2569.1513   | -0.0007           |
| 3   | 1     | 2     | 2    | 1      | 1      | 2642.0004   | -0.0002           |
| 6   | 3     | 4     | 6    | 1      | 5      | 2885.6753   | 0.0010            |
| 2   | 2     | 0     | 1    | 1      | 0      | 2937.5185   | -0.0009           |
| 5   | 3     | 3     | 5    | 1      | 4      | 2947.9485   | -0.0020           |
| 5   | 4     | 1     | 5    | 3      | 3      | 3009.1101   | -0.0019           |
| 8   | 1     | 7     | 8    | 1      | 8      | 3011.6935   | 0.0014            |
| 2   | 2     | 1     | 1    | 1      | 1      | 3020.8685   | 0.0040            |
| 8   | 3     | 6     | 8    | 1      | 7      | 3024.7836   | -0.0011           |
| 4   | 1     | 4     | 3    | 1      | 3      | 3106.0976   | 0.0016            |
| 4   | 0     | 4     | 3    | 0      | 3      | 3187.8774   | -0.0023           |
| 8   | 2     | 7     | 8    | 0      | 8      | 3189.1261   | -0.0025           |
| 9   | 3     | 7     | 9    | 1      | 8      | 3240.8236   | 0.0033            |
| 4   | 2     | 3     | 3    | 2      | 2      | 3323.6177   | 0.0004            |
| 4   | 3     | 2     | 3    | 3      | 1      | 3366.9407   | 0.0009            |
| 4   | 3     | 1     | 3    | 3      | 0      | 3378.1242   | 0.0020            |
| 2   | 2     | 0     | 1    | 0      | 1      | 3421.8386   | 0.0003            |
| 4   | 2     | 2     | 3    | 2      | 1      | 3472.7754   | 0.0018            |
| 4   | 1     | 3     | 3    | 1      | 2      | 3497.6887   | 0.0004            |
| 10  | 3     | 8     | 10   | 1      | 9      | 3536.5616   | -0.0016           |
| 11  | 2     | 9     | 11   | 2      | 10     | 3559.4368   | 0.0022            |
| 9   | 2     | 8     | 9    | 0      | 9      | 3600.2997   | -0.0018           |
| 3   | 2     | 1     | 2    | 1      | 1      | 3737.3715   | 0.0029            |
| 5   | 1     | 5     | 4    | 1      | 4      | 3860.8678   | -0.0008           |
| 3   | 2     | 2     | 2    | 1      | 2      | 3955.8627   | 0.0003            |
| 5   | 2     | 4     | 4    | 2      | 3      | 4133.0508   | -0.0009           |
| 5   | 4     | 1     | 4    | 4      | 0      | 4211.3334   | -0.0001           |
| 5   | 3     | 3     | 4    | 3      | 2      | 4213.9367   | 0.0014            |
| 5   | 3     | 2     | 4    | 3      | 1      | 4251.3608   | -0.0017           |
| 5   | 1     | 4     | 4    | 1      | 3      | 4326.8918   | -0.0001           |
| 3   | 2     | 1     | 2    | 0      | 2      | 4339.7351   | 0.0028            |
| 5   | 2     | 3     | 4    | 2      | 2      | 4385.7759   | 0.0000            |

|   |   |   |   |   |   |           |         |
|---|---|---|---|---|---|-----------|---------|
| 4 | 2 | 2 | 3 | 1 | 2 | 4568.1428 | 0.0012  |
| 6 | 1 | 6 | 5 | 1 | 5 | 4607.7404 | -0.0011 |
| 6 | 0 | 6 | 5 | 0 | 5 | 4641.0282 | -0.0013 |
| 3 | 3 | 0 | 2 | 2 | 0 | 4667.3409 | -0.0010 |
| 3 | 3 | 1 | 2 | 2 | 1 | 4682.7903 | 0.0007  |
| 6 | 2 | 5 | 5 | 2 | 4 | 4929.3049 | 0.0005  |
| 4 | 2 | 3 | 3 | 1 | 3 | 4937.6593 | -0.0003 |
| 6 | 5 | 2 | 5 | 5 | 1 | 5049.7363 | -0.0007 |
| 6 | 5 | 1 | 5 | 5 | 0 | 5049.8753 | -0.0015 |
| 6 | 3 | 4 | 5 | 3 | 3 | 5057.8621 | -0.0001 |
| 6 | 4 | 3 | 5 | 4 | 2 | 5062.9628 | 0.0013  |
| 6 | 4 | 2 | 5 | 4 | 1 | 5068.9466 | 0.0005  |
| 6 | 1 | 5 | 5 | 1 | 4 | 5120.1377 | -0.0007 |
| 6 | 3 | 3 | 5 | 3 | 2 | 5149.4763 | -0.0012 |
| 6 | 2 | 4 | 5 | 2 | 3 | 5288.0841 | 0.0001  |
| 7 | 1 | 7 | 6 | 1 | 6 | 5348.9426 | -0.0015 |
| 7 | 0 | 7 | 6 | 0 | 6 | 5366.5674 | 0.0010  |
| 4 | 2 | 2 | 3 | 0 | 3 | 5375.8365 | -0.0005 |
| 5 | 1 | 4 | 4 | 0 | 4 | 5444.3988 | 0.0029  |
| 5 | 2 | 3 | 4 | 1 | 3 | 5456.2247 | -0.0044 |
| 4 | 3 | 1 | 3 | 2 | 1 | 5476.3111 | -0.0009 |
| 4 | 3 | 2 | 3 | 2 | 2 | 5546.8203 | 0.0023  |
| 7 | 2 | 6 | 6 | 2 | 5 | 5711.5409 | -0.0017 |
| 7 | 1 | 6 | 6 | 1 | 5 | 5874.6142 | -0.0026 |
| 7 | 6 | 1 | 6 | 6 | 0 | 5889.3707 | -0.0065 |
| 7 | 6 | 2 | 6 | 6 | 1 | 5889.3707 | 0.0064  |
| 7 | 5 | 3 | 6 | 5 | 2 | 5902.2913 | 0.0000  |
| 7 | 5 | 2 | 6 | 5 | 1 | 5903.0509 | 0.0029  |
| 7 | 4 | 4 | 6 | 4 | 3 | 5919.3938 | -0.0006 |
| 7 | 4 | 3 | 6 | 4 | 2 | 5938.5449 | -0.0011 |
| 5 | 2 | 4 | 4 | 1 | 4 | 5964.6169 | 0.0016  |
| 7 | 3 | 4 | 6 | 3 | 3 | 6072.8094 | 0.0013  |
| 8 | 1 | 8 | 7 | 1 | 7 | 6086.5568 | 0.0014  |
| 8 | 0 | 8 | 7 | 0 | 7 | 6095.2674 | -0.0004 |
| 7 | 2 | 5 | 6 | 2 | 4 | 6165.8938 | 0.0018  |
| 5 | 3 | 2 | 4 | 2 | 2 | 6254.9013 | 0.0004  |
| 4 | 4 | 0 | 3 | 3 | 0 | 6376.7502 | -0.0013 |
| 4 | 4 | 1 | 3 | 3 | 1 | 6378.4844 | 0.0032  |
| 6 | 2 | 4 | 5 | 1 | 4 | 6417.4203 | -0.0010 |
| 5 | 3 | 3 | 4 | 2 | 3 | 6437.1354 | -0.0006 |
| 8 | 2 | 7 | 7 | 2 | 6 | 6480.2981 | -0.0029 |
| 5 | 2 | 3 | 4 | 0 | 4 | 6573.7279 | -0.0052 |

|   |   |   |   |   |   |           |         |
|---|---|---|---|---|---|-----------|---------|
| 8 | 1 | 7 | 7 | 1 | 6 | 6600.2973 | -0.0001 |
| 8 | 3 | 6 | 7 | 3 | 5 | 6719.6224 | -0.0011 |
| 8 | 7 | 2 | 7 | 7 | 1 | 6729.1362 | 0.0012  |
| 8 | 7 | 1 | 7 | 7 | 0 | 6729.1362 | 0.0001  |
| 8 | 6 | 3 | 7 | 6 | 2 | 6740.7725 | 0.0008  |
| 8 | 6 | 2 | 7 | 6 | 1 | 6740.8549 | 0.0003  |
| 8 | 5 | 4 | 7 | 5 | 3 | 6759.4685 | -0.0003 |
| 8 | 5 | 3 | 7 | 5 | 2 | 6762.4198 | 0.0004  |
| 8 | 4 | 5 | 7 | 4 | 4 | 6776.9517 | -0.0036 |
| 9 | 1 | 9 | 8 | 1 | 8 | 6822.1165 | 0.0006  |
| 9 | 0 | 9 | 8 | 0 | 8 | 6826.2347 | 0.0045  |

**Table S2.2.** II-2W-1/2/3 (*para*) assigned transitions, along with their frequencies and deviation from the calculated value ( $\Delta\nu = \nu - \nu_{\text{calc}}$ ).

| $J$ | $K_a$ | $K_c$ | $J'$ | $K_a'$ | $K_c'$ | $\nu$ / MHz | $\Delta\nu$ / MHz |
|-----|-------|-------|------|--------|--------|-------------|-------------------|
| 2   | 0     | 2     | 1    | 0      | 1      | 1652.1522   | -0.0010           |
| 2   | 1     | 1     | 1    | 1      | 0      | 1772.6766   | -0.0026           |
| 3   | 1     | 3     | 2    | 1      | 2      | 2341.0777   | 0.0004            |
| 3   | 2     | 2     | 2    | 2      | 1      | 2505.2595   | 0.0003            |
| 3   | 2     | 1     | 2    | 2      | 0      | 2573.9247   | -0.0100           |
| 2   | 2     | 0     | 1    | 1      | 0      | 2935.3984   | -0.0007           |
| 2   | 2     | 1     | 1    | 1      | 1      | 3019.8842   | -0.0010           |
| 8   | 3     | 6     | 8    | 1      | 7      | 3031.2812   | 0.0026            |
| 4   | 1     | 4     | 3    | 1      | 3      | 3104.5508   | 0.0026            |
| 4   | 0     | 4     | 3    | 0      | 3      | 3186.0363   | -0.0064           |
| 4   | 2     | 3     | 3    | 2      | 2      | 3326.2203   | 0.0024            |
| 4   | 3     | 2     | 3    | 3      | 1      | 3371.1251   | -0.0012           |
| 4   | 3     | 1     | 3    | 3      | 0      | 3382.9763   | 0.0021            |
| 2   | 2     | 0     | 1    | 0      | 1      | 3419.4758   | 0.0021            |
| 4   | 2     | 2     | 3    | 2      | 1      | 3480.3259   | -0.0006           |
| 4   | 1     | 3     | 3    | 1      | 2      | 3502.7156   | -0.0018           |
| 9   | 2     | 8     | 9    | 0      | 9      | 3633.4785   | -0.0052           |
| 3   | 2     | 1     | 2    | 1      | 1      | 3736.6539   | -0.0007           |
| 5   | 1     | 5     | 4    | 1      | 4      | 3858.2860   | 0.0072            |
| 5   | 0     | 5     | 4    | 0      | 4      | 3913.9190   | -0.0001           |
| 3   | 2     | 2     | 2    | 1      | 2      | 3957.4753   | -0.0014           |
| 5   | 2     | 4     | 4    | 2      | 3      | 4135.4834   | 0.0010            |
| 5   | 4     | 2     | 4    | 4      | 1      | 4215.3691   | 0.0043            |
| 5   | 4     | 1     | 4    | 4      | 0      | 4216.8384   | 0.0000            |
| 5   | 3     | 3     | 4    | 3      | 2      | 4219.1725   | -0.0044           |
| 5   | 3     | 2     | 4    | 3      | 1      | 4258.7519   | -0.0004           |
| 5   | 1     | 4     | 4    | 1      | 3      | 4331.2032   | -0.0005           |

|   |   |   |   |   |   |           |         |
|---|---|---|---|---|---|-----------|---------|
| 3 | 2 | 1 | 2 | 0 | 2 | 4341.2565 | 0.0013  |
| 5 | 2 | 3 | 4 | 2 | 2 | 4395.5035 | -0.0010 |
| 4 | 2 | 2 | 3 | 1 | 2 | 4570.4158 | 0.0102  |
| 6 | 1 | 6 | 5 | 1 | 5 | 4603.9883 | 0.0013  |
| 3 | 3 | 0 | 2 | 2 | 0 | 4663.7566 | 0.0006  |
| 3 | 3 | 1 | 2 | 2 | 1 | 4679.7575 | -0.0013 |
| 6 | 2 | 5 | 5 | 2 | 4 | 4931.1112 | 0.0033  |
| 6 | 5 | 2 | 5 | 5 | 1 | 5056.1496 | 0.0000  |
| 6 | 5 | 1 | 5 | 5 | 0 | 5056.3053 | 0.0012  |
| 6 | 3 | 4 | 5 | 3 | 3 | 5063.8531 | -0.0011 |
| 6 | 4 | 3 | 5 | 4 | 2 | 5069.7829 | -0.0030 |
| 6 | 4 | 2 | 5 | 4 | 1 | 5076.2572 | 0.0027  |
| 6 | 1 | 5 | 5 | 1 | 4 | 5122.3361 | -0.0029 |
| 6 | 3 | 3 | 5 | 3 | 2 | 5160.3606 | 0.0019  |
| 6 | 2 | 4 | 5 | 2 | 3 | 5298.8047 | -0.0014 |
| 7 | 1 | 7 | 6 | 1 | 6 | 5344.0006 | 0.0002  |
| 7 | 0 | 7 | 6 | 0 | 6 | 5360.9045 | -0.0017 |
| 4 | 2 | 2 | 3 | 0 | 3 | 5385.0003 | 0.0001  |
| 5 | 1 | 4 | 4 | 0 | 4 | 5462.4756 | 0.0026  |
| 5 | 2 | 3 | 4 | 1 | 3 | 5463.1897 | -0.0029 |
| 4 | 3 | 1 | 3 | 2 | 1 | 5472.7966 | 0.0012  |
| 4 | 3 | 2 | 3 | 2 | 2 | 5545.6251 | -0.0008 |
| 7 | 2 | 6 | 6 | 2 | 5 | 5712.3004 | -0.0018 |
| 7 | 1 | 6 | 6 | 1 | 5 | 5873.8458 | -0.0032 |
| 7 | 6 | 2 | 6 | 6 | 1 | 5896.7696 | -0.0014 |
| 7 | 6 | 1 | 6 | 6 | 0 | 5896.7845 | -0.0011 |
| 7 | 3 | 5 | 6 | 3 | 4 | 5900.6682 | 0.0013  |
| 7 | 5 | 3 | 6 | 5 | 2 | 5910.1861 | 0.0002  |
| 7 | 5 | 2 | 6 | 5 | 1 | 5911.0215 | 0.0002  |
| 7 | 4 | 4 | 6 | 4 | 3 | 5927.6513 | -0.0001 |
| 7 | 4 | 3 | 6 | 4 | 2 | 5948.3117 | -0.0014 |
| 5 | 2 | 4 | 4 | 1 | 4 | 5973.5493 | -0.0021 |
| 8 | 1 | 8 | 7 | 1 | 7 | 6080.4496 | -0.0020 |
| 7 | 3 | 4 | 6 | 3 | 3 | 6087.4881 | 0.0033  |
| 8 | 0 | 8 | 7 | 0 | 7 | 6088.7125 | 0.0005  |
| 7 | 2 | 5 | 6 | 2 | 4 | 6176.2726 | 0.0007  |
| 4 | 4 | 0 | 3 | 3 | 0 | 6371.8766 | -0.0010 |
| 4 | 4 | 1 | 3 | 3 | 1 | 6373.7096 | 0.0016  |

|   |   |   |   |   |   |           |         |
|---|---|---|---|---|---|-----------|---------|
| 8 | 2 | 7 | 7 | 2 | 6 | 6479.7134 | -0.0026 |
| 8 | 1 | 7 | 7 | 1 | 6 | 6596.9016 | -0.0040 |
| 8 | 3 | 6 | 7 | 3 | 5 | 6725.5817 | -0.0041 |
| 8 | 7 | 1 | 7 | 7 | 0 | 6737.5374 | -0.0020 |
| 8 | 7 | 2 | 7 | 7 | 1 | 6737.5374 | -0.0007 |
| 8 | 6 | 3 | 7 | 6 | 2 | 6749.6275 | -0.0015 |
| 8 | 6 | 2 | 7 | 6 | 1 | 6749.7263 | 0.0039  |
| 8 | 5 | 4 | 7 | 5 | 3 | 6768.9907 | 0.0009  |
| 8 | 5 | 3 | 7 | 5 | 2 | 6772.2491 | 0.0058  |
| 8 | 4 | 5 | 7 | 4 | 4 | 6786.4619 | 0.0011  |
| 9 | 1 | 9 | 8 | 1 | 8 | 6814.8964 | 0.0010  |
| 9 | 0 | 9 | 8 | 0 | 8 | 6818.7509 | -0.0011 |
| 8 | 4 | 4 | 7 | 4 | 3 | 6839.4484 | 0.0084  |

**Table S2.3.** II-2W-1/2/3 ( $^{18}\text{O}^{18}\text{O}$ ) assigned transitions, along with their frequencies and deviation from the calculated value ( $\Delta\nu = \nu - \nu_{\text{calc}}$ ).

| $J$ | $K_a$ | $K_c$ | $J'$ | $K_a'$ | $K_c'$ | $\nu$ / MHz | $\Delta\nu$ / MHz |
|-----|-------|-------|------|--------|--------|-------------|-------------------|
| 3   | 1     | 3     | 2    | 1      | 2      | 2267.4727   | 0.0042            |
| 3   | 0     | 3     | 2    | 0      | 2      | 2360.5253   | -0.0069           |
| 4   | 1     | 4     | 3    | 1      | 3      | 3006.0094   | 0.0028            |
| 4   | 0     | 4     | 3    | 0      | 3      | 3083.8763   | 0.0001            |
| 4   | 2     | 3     | 3    | 2      | 2      | 3226.9495   | -0.0024           |
| 4   | 3     | 1     | 3    | 3      | 0      | 3285.7988   | -0.0001           |
| 4   | 2     | 2     | 3    | 2      | 1      | 3384.4008   | 0.0021            |
| 4   | 1     | 3     | 3    | 1      | 2      | 3401.2091   | 0.0020            |
| 5   | 1     | 5     | 4    | 1      | 4      | 3734.7549   | 0.0120            |
| 5   | 0     | 5     | 4    | 0      | 4      | 3786.6707   | 0.0018            |
| 5   | 2     | 4     | 4    | 2      | 3      | 4010.7091   | -0.0003           |
| 5   | 4     | 2     | 4    | 4      | 1      | 4093.1146   | -0.0014           |
| 5   | 4     | 1     | 4    | 4      | 0      | 4094.7503   | -0.0042           |
| 5   | 3     | 3     | 4    | 3      | 2      | 4096.4659   | -0.0023           |
| 5   | 3     | 2     | 4    | 3      | 1      | 4138.6509   | 0.0026            |
| 5   | 1     | 4     | 4    | 1      | 3      | 4202.3761   | -0.0063           |
| 5   | 2     | 3     | 4    | 2      | 2      | 4274.2999   | -0.0074           |
| 6   | 1     | 6     | 5    | 1      | 5      | 4455.5532   | 0.0084            |
| 6   | 0     | 6     | 5    | 0      | 5      | 4485.0033   | -0.0010           |
| 6   | 2     | 5     | 5    | 2      | 4      | 4780.4998   | 0.0028            |
| 6   | 3     | 4     | 5    | 3      | 3      | 4915.9856   | 0.0016            |
| 6   | 4     | 3     | 5    | 4      | 2      | 4923.3026   | -0.0049           |
| 6   | 4     | 2     | 5    | 4      | 1      | 4930.4865   | 0.0017            |



|   |   |   |   |   |   |           |         |
|---|---|---|---|---|---|-----------|---------|
| 6 | 1 | 5 | 5 | 1 | 4 | 4965.0535 | -0.0054 |
| 6 | 3 | 3 | 5 | 3 | 2 | 5018.0857 | 0.0022  |
| 5 | 2 | 3 | 4 | 1 | 3 | 5298.0074 | 0.0081  |
| 7 | 2 | 6 | 6 | 2 | 5 | 5535.6366 | -0.0022 |
| 7 | 1 | 6 | 6 | 1 | 5 | 5688.1683 | -0.0084 |
| 7 | 6 | 2 | 6 | 6 | 1 | 5725.5505 | 0.0164  |
| 7 | 6 | 1 | 6 | 6 | 0 | 5725.5505 | -0.0011 |
| 7 | 3 | 5 | 6 | 3 | 4 | 5727.0292 | -0.0050 |
| 7 | 4 | 4 | 6 | 4 | 3 | 5756.7996 | 0.0034  |
| 7 | 4 | 3 | 6 | 4 | 2 | 5779.6373 | -0.0010 |
| 8 | 1 | 8 | 7 | 1 | 7 | 5882.7493 | 0.0022  |
| 8 | 0 | 8 | 7 | 0 | 7 | 5889.9484 | 0.0028  |
| 7 | 3 | 4 | 6 | 3 | 3 | 5922.4663 | 0.0019  |
| 7 | 2 | 5 | 6 | 2 | 4 | 5999.5245 | -0.0046 |
| 8 | 2 | 7 | 7 | 2 | 6 | 6276.9811 | -0.0070 |
| 8 | 3 | 6 | 7 | 3 | 5 | 6525.5664 | 0.0013  |
| 8 | 3 | 5 | 7 | 3 | 4 | 6835.5293 | 0.0089  |

**Table S2.4.** II-2W-1/2/3 ( $^{16}\text{O}^{18}\text{O}$ ) assigned transitions, along with their frequencies and deviation from the calculated value ( $\Delta\nu = \nu - \nu_{\text{calc}}$ ).

| $J$ | $K_a$ | $K_c$ | $J'$ | $K_a'$ | $K_c'$ | $\nu$ / MHz | $\Delta\nu$ / MHz |
|-----|-------|-------|------|--------|--------|-------------|-------------------|
| 3   | 1     | 3     | 2    | 1      | 2      | 2295.5148   | -0.0015           |
| 3   | 0     | 3     | 2    | 0      | 2      | 2389.3885   | 0.0074            |
| 4   | 2     | 2     | 3    | 2      | 1      | 3397.1752   | -0.0035           |
| 4   | 1     | 3     | 3    | 1      | 2      | 3426.3358   | -0.0039           |
| 5   | 0     | 5     | 4    | 0      | 4      | 3844.1423   | -0.0070           |
| 5   | 2     | 4     | 4    | 2      | 3      | 4050.0283   | 0.0003            |
| 5   | 3     | 2     | 4    | 3      | 1      | 4160.2964   | 0.0004            |
| 5   | 1     | 4     | 4    | 1      | 3      | 4240.9026   | -0.0018           |
| 5   | 2     | 3     | 4    | 2      | 2      | 4290.7671   | 0.0027            |
| 6   | 1     | 6     | 5    | 1      | 5      | 4518.8458   | -0.0024           |
| 6   | 0     | 6     | 5    | 0      | 5      | 4553.9203   | 0.0010            |
| 6   | 2     | 5     | 5    | 2      | 4      | 4831.4986   | 0.0101            |
| 6   | 3     | 4     | 5    | 3      | 3      | 4953.1989   | 0.0013            |
| 6   | 4     | 3     | 5    | 4      | 2      | 4956.9733   | 0.0046            |
| 6   | 4     | 2     | 5    | 4      | 1      | 4962.1982   | 0.0044            |
| 6   | 1     | 5     | 5    | 1      | 4      | 5021.8185   | 0.0027            |
| 6   | 2     | 4     | 5    | 2      | 3      | 5175.6113   | -0.0074           |
| 7   | 1     | 7     | 6    | 1      | 6      | 5246.1568   | -0.0028           |
| 7   | 0     | 7     | 6    | 0      | 6      | 5265.1335   | 0.0003            |
| 7   | 2     | 6     | 6    | 2      | 5      | 5599.6244   | 0.0020            |
| 7   | 1     | 6     | 6    | 1      | 5      | 5765.4665   | -0.0030           |

|   |   |   |   |   |   |           |         |
|---|---|---|---|---|---|-----------|---------|
| 7 | 3 | 5 | 6 | 3 | 4 | 5773.4536 | -0.0015 |
| 7 | 5 | 3 | 6 | 5 | 2 | 5778.7476 | -0.0001 |
| 7 | 4 | 3 | 6 | 4 | 2 | 5812.0034 | 0.0000  |
| 7 | 3 | 4 | 6 | 3 | 3 | 5938.0632 | -0.0026 |
| 8 | 1 | 8 | 7 | 1 | 7 | 5969.8254 | -0.0016 |
| 7 | 2 | 5 | 6 | 2 | 4 | 6038.1789 | 0.0011  |
| 8 | 2 | 7 | 7 | 2 | 6 | 6354.7804 | 0.0004  |
| 9 | 0 | 9 | 8 | 0 | 8 | 6695.9801 | 0.0012  |

**Table S2.5.** II-2W-1/2/3 ( $^{18}\text{O}^{16}\text{O}$ ) assigned transitions, along with their frequencies and deviation from the calculated value ( $\Delta\nu = \nu - \nu_{\text{calc}}$ ).

| $J$ | $K_a$ | $K_c$ | $J'$ | $K_a'$ | $K_c'$ | $\nu$ / MHz | $\Delta\nu$ / MHz |
|-----|-------|-------|------|--------|--------|-------------|-------------------|
| 3   | 1     | 3     | 2    | 1      | 2      | 2312.2988   | 0.0047            |
| 4   | 1     | 4     | 3    | 1      | 3      | 3064.6856   | -0.0017           |
| 4   | 0     | 4     | 3    | 0      | 3      | 3141.4328   | -0.0044           |
| 4   | 2     | 3     | 3    | 2      | 2      | 3293.0001   | -0.0008           |
| 4   | 2     | 2     | 3    | 2      | 1      | 3459.9634   | -0.0048           |
| 4   | 1     | 3     | 3    | 1      | 2      | 3471.1386   | -0.0027           |
| 5   | 1     | 5     | 4    | 1      | 4      | 3806.8541   | -0.0027           |
| 5   | 0     | 5     | 4    | 0      | 4      | 3856.7249   | 0.0042            |
| 5   | 3     | 2     | 4    | 3      | 1      | 4229.7132   | 0.0009            |
| 5   | 1     | 4     | 4    | 1      | 3      | 4285.7454   | -0.0034           |
| 5   | 2     | 3     | 4    | 2      | 2      | 4368.8046   | -0.0026           |
| 6   | 1     | 6     | 5    | 1      | 5      | 4540.9058   | -0.0015           |
| 6   | 2     | 5     | 5    | 2      | 4      | 4875.4025   | -0.0030           |
| 6   | 4     | 3     | 5    | 4      | 2      | 5028.2255   | 0.0051            |
| 6   | 1     | 5     | 5    | 1      | 4      | 5059.2058   | 0.0039            |
| 6   | 3     | 3     | 5    | 3      | 2      | 5131.3344   | 0.0078            |
| 6   | 2     | 4     | 5    | 2      | 3      | 5261.5697   | 0.0012            |
| 7   | 1     | 7     | 6    | 1      | 6      | 5269.4414   | 0.0000            |
| 7   | 0     | 7     | 6    | 0      | 6      | 5283.1823   | 0.0030            |
| 7   | 2     | 6     | 6    | 2      | 5      | 5643.7718   | 0.0038            |
| 7   | 1     | 6     | 6    | 1      | 5      | 5791.9444   | 0.0007            |
| 7   | 3     | 5     | 6    | 3      | 4      | 5845.5745   | 0.0066            |
| 7   | 5     | 3     | 6    | 5      | 2      | 5861.6896   | -0.0043           |
| 7   | 5     | 2     | 6    | 5      | 1      | 5862.8507   | -0.0076           |
| 7   | 4     | 4     | 6    | 4      | 3      | 5879.6861   | 0.0039            |
| 7   | 4     | 3     | 6    | 4      | 2      | 5906.0506   | -0.0016           |
| 8   | 0     | 8     | 7    | 0      | 7      | 6001.1015   | 0.0002            |
| 7   | 3     | 4     | 6    | 3      | 3      | 6057.9087   | -0.0015           |
| 7   | 2     | 5     | 6    | 2      | 4      | 6124.2939   | 0.0013            |
| 8   | 2     | 7     | 7    | 2      | 6      | 6397.8375   | -0.0056           |

|   |   |   |   |   |   |           |         |
|---|---|---|---|---|---|-----------|---------|
| 8 | 1 | 7 | 7 | 1 | 6 | 6499.4344 | -0.0006 |
|---|---|---|---|---|---|-----------|---------|

**Table S2.6.** II-2W-1/2/3 (OD-HOH-HOH) assigned transitions, along with their frequencies and deviation from the calculated value ( $\Delta\nu = \nu - \nu_{\text{calc}}$ ).

| $J$ | $K_a$ | $K_c$ | $J'$ | $K_a'$ | $K_c'$ | $\nu$ / MHz | $\Delta\nu$ / MHz |
|-----|-------|-------|------|--------|--------|-------------|-------------------|
| 3   | 1     | 3     | 2    | 1      | 2      | 2335.0667   | -0.0020           |
| 3   | 1     | 2     | 2    | 1      | 1      | 2638.4574   | -0.0025           |
| 4   | 1     | 4     | 3    | 1      | 3      | 3096.5874   | 0.0004            |
| 4   | 0     | 4     | 3    | 0      | 3      | 3177.0909   | -0.0042           |
| 4   | 2     | 3     | 3    | 2      | 2      | 3316.8014   | -0.0004           |
| 4   | 3     | 2     | 3    | 3      | 1      | 3361.6075   | 0.0039            |
| 4   | 1     | 3     | 3    | 1      | 2      | 3491.9192   | -0.0019           |
| 5   | 1     | 5     | 4    | 1      | 4      | 3848.4140   | -0.0015           |
| 5   | 0     | 5     | 4    | 0      | 4      | 3903.2080   | -0.0021           |
| 5   | 2     | 4     | 4    | 2      | 3      | 4123.7550   | -0.0027           |
| 5   | 4     | 1     | 4    | 4      | 0      | 4204.9792   | 0.0049            |
| 5   | 3     | 3     | 4    | 3      | 2      | 4207.2247   | 0.0088            |
| 5   | 3     | 2     | 4    | 3      | 1      | 4246.8891   | 0.0004            |
| 5   | 1     | 4     | 4    | 1      | 3      | 4317.7420   | -0.0019           |
| 5   | 2     | 3     | 4    | 2      | 2      | 4382.6760   | 0.0032            |
| 6   | 1     | 6     | 5    | 1      | 5      | 4592.2799   | -0.0010           |
| 6   | 0     | 6     | 5    | 0      | 5      | 4624.0190   | -0.0005           |
| 6   | 5     | 2     | 5    | 5      | 1      | 5041.9112   | -0.0026           |
| 6   | 5     | 1     | 5    | 5      | 0      | 5042.0709   | 0.0006            |
| 6   | 3     | 4     | 5    | 3      | 3      | 5049.4138   | -0.0024           |
| 6   | 4     | 2     | 5    | 4      | 1      | 5062.0158   | 0.0006            |
| 6   | 1     | 5     | 5    | 1      | 4      | 5106.2850   | -0.0041           |
| 6   | 3     | 3     | 5    | 3      | 2      | 5146.0640   | -0.0019           |
| 7   | 1     | 7     | 6    | 1      | 6      | 5330.5130   | 0.0039            |
| 7   | 0     | 7     | 6    | 0      | 6      | 5347.0570   | 0.0028            |
| 7   | 2     | 6     | 6    | 2      | 5      | 5696.0980   | 0.0007            |
| 7   | 1     | 6     | 6    | 1      | 5      | 5855.4480   | -0.0005           |
| 7   | 3     | 5     | 6    | 3      | 4      | 5883.7200   | -0.0010           |
| 7   | 4     | 4     | 6    | 4      | 3      | 5910.9070   | -0.0011           |
| 7   | 4     | 3     | 6    | 4      | 2      | 5931.7170   | -0.0063           |
| 8   | 1     | 8     | 7    | 1      | 7      | 6065.2270   | 0.0057            |
| 7   | 3     | 4     | 6    | 3      | 3      | 6070.5470   | 0.0034            |
| 8   | 2     | 7     | 7    | 2      | 6      | 6461.3793   | -0.0016           |
| 8   | 1     | 7     | 7    | 1      | 6      | 6576.5753   | 0.0067            |
| 8   | 3     | 6     | 7    | 3      | 5      | 6706.1224   | 0.0009            |
| 9   | 0     | 9     | 8    | 0      | 8      | 6801.7038   | -0.0070           |

**Table S2.7. II-2W-1/2/3 (OD-DOH-DOH) assigned transitions, along with their frequencies and deviation from the calculated value ( $\Delta v = v - v_{\text{calc}}$ ).**

| $J$ | $K_a$ | $K_c$ | $J'$ | $K_a'$ | $K_c'$ | $v$ / MHz | $\Delta v$ / MHz |
|-----|-------|-------|------|--------|--------|-----------|------------------|
| 3   | 1     | 3     | 2    | 1      | 2      | 2301.1488 | -0.0003          |
| 3   | 0     | 3     | 2    | 0      | 2      | 2395.3328 | -0.0048          |
| 4   | 2     | 2     | 3    | 2      | 1      | 3426.5759 | 0.0002           |
| 5   | 1     | 5     | 4    | 1      | 4      | 3791.5626 | -0.0016          |
| 5   | 0     | 5     | 4    | 0      | 4      | 3845.5255 | -0.0015          |
| 5   | 2     | 4     | 4    | 2      | 3      | 4067.2253 | 0.0012           |
| 5   | 1     | 4     | 4    | 1      | 3      | 4260.6249 | -0.0049          |
| 6   | 1     | 6     | 5    | 1      | 5      | 4523.9506 | 0.0031           |
| 6   | 0     | 6     | 5    | 0      | 5      | 4555.0174 | 0.0039           |
| 6   | 2     | 5     | 5    | 2      | 4      | 4848.9815 | 0.0050           |
| 6   | 3     | 4     | 5    | 3      | 3      | 4982.2864 | 0.0040           |
| 6   | 4     | 3     | 5    | 4      | 2      | 4988.7182 | -0.0043          |
| 6   | 4     | 2     | 5    | 4      | 1      | 4995.4335 | -0.0007          |
| 6   | 3     | 3     | 5    | 3      | 2      | 5080.5780 | 0.0040           |
| 6   | 2     | 4     | 5    | 2      | 3      | 5216.2350 | 0.0049           |
| 7   | 1     | 7     | 6    | 1      | 6      | 5250.7250 | -0.0007          |
| 7   | 0     | 7     | 6    | 0      | 6      | 5266.8260 | 0.0002           |
| 7   | 2     | 6     | 6    | 2      | 5      | 5616.2664 | -0.0007          |
| 7   | 1     | 6     | 6    | 1      | 5      | 5773.6761 | -0.0049          |
| 7   | 3     | 5     | 6    | 3      | 4      | 5805.0996 | -0.0005          |
| 7   | 4     | 4     | 6    | 4      | 3      | 5833.0495 | 0.0010           |
| 7   | 4     | 3     | 6    | 4      | 2      | 5854.4558 | -0.0016          |
| 8   | 1     | 8     | 7    | 1      | 7      | 5974.0269 | -0.0017          |
| 8   | 0     | 8     | 7    | 0      | 7      | 5981.8271 | -0.0017          |
| 7   | 3     | 4     | 6    | 3      | 3      | 5994.5513 | -0.0031          |
| 7   | 2     | 5     | 6    | 2      | 4      | 6078.4783 | -0.0011          |
| 8   | 2     | 7     | 7    | 2      | 6      | 6369.8207 | -0.0005          |
| 8   | 1     | 7     | 7    | 1      | 6      | 6482.8409 | 0.0052           |

**Table S2.8. II-2W-1/2/3 (OD-DOH-HOH) assigned transitions, along with their frequencies and deviation from the calculated value ( $\Delta v = v - v_{\text{calc}}$ ).**

| $J$ | $K_a$ | $K_c$ | $J'$ | $K_a'$ | $K_c'$ | $v$ / MHz | $\Delta v$ / MHz |
|-----|-------|-------|------|--------|--------|-----------|------------------|
| 5   | 1     | 5     | 4    | 1      | 4      | 3821.2884 | 0.0022           |
| 5   | 1     | 4     | 4    | 1      | 3      | 4293.4691 | 0.0000           |
| 5   | 2     | 3     | 4    | 2      | 2      | 4365.1554 | -0.0003          |
| 6   | 1     | 6     | 5    | 1      | 5      | 4559.1994 | 0.0035           |
| 6   | 0     | 6     | 5    | 0      | 5      | 4589.2092 | -0.0049          |
| 6   | 2     | 5     | 5    | 2      | 4      | 4887.1378 | 0.0005           |

|   |   |   |   |   |   |           |         |
|---|---|---|---|---|---|-----------|---------|
| 6 | 3 | 4 | 5 | 3 | 3 | 5023.4697 | 0.0053  |
| 6 | 1 | 5 | 5 | 1 | 4 | 5074.0015 | -0.0047 |
| 6 | 2 | 4 | 5 | 2 | 3 | 5260.1022 | -0.0004 |
| 7 | 1 | 7 | 6 | 1 | 6 | 5291.5244 | 0.0021  |
| 7 | 0 | 7 | 6 | 0 | 6 | 5306.8999 | -0.0032 |
| 7 | 2 | 6 | 6 | 2 | 5 | 5659.8053 | -0.0004 |
| 7 | 1 | 6 | 6 | 1 | 5 | 5814.6363 | 0.0042  |
| 7 | 4 | 4 | 6 | 4 | 3 | 5882.1796 | -0.0041 |
| 7 | 4 | 3 | 6 | 4 | 2 | 5904.9672 | 0.0007  |
| 8 | 1 | 8 | 7 | 1 | 7 | 6020.4243 | -0.0032 |
| 8 | 0 | 8 | 7 | 0 | 7 | 6027.7997 | 0.0009  |
| 8 | 2 | 7 | 7 | 2 | 6 | 6418.5652 | 0.0009  |
| 9 | 0 | 9 | 8 | 0 | 8 | 6750.8255 | 0.0012  |

**Table S2.9.** II-2W-1/2/3 (OD-HOH-DOH) assigned transitions, along with their frequencies and deviation from the calculated value ( $\Delta\nu = \nu - \nu_{\text{calc}}$ ).

| $J$ | $K_a$ | $K_c$ | $J'$ | $K_a'$ | $K_c'$ | $\nu$ / MHz | $\Delta\nu$ / MHz |
|-----|-------|-------|------|--------|--------|-------------|-------------------|
| 4   | 1     | 4     | 3    | 1      | 3      | 3072.1561   | 0.0052            |
| 4   | 0     | 4     | 3    | 0      | 3      | 3153.4503   | 0.0019            |
| 4   | 2     | 3     | 3    | 2      | 2      | 3289.8292   | -0.0070           |
| 4   | 2     | 2     | 3    | 2      | 1      | 3439.7279   | -0.0005           |
| 5   | 1     | 5     | 4    | 1      | 4      | 3818.3488   | 0.0005            |
| 5   | 0     | 5     | 4    | 0      | 4      | 3874.3491   | 0.0010            |
| 5   | 2     | 3     | 4    | 2      | 2      | 4344.3383   | -0.0001           |
| 6   | 1     | 6     | 5    | 1      | 5      | 4556.6492   | 0.0024            |
| 6   | 0     | 6     | 5    | 0      | 5      | 4589.4803   | -0.0032           |
| 6   | 2     | 5     | 5    | 2      | 4      | 4878.2825   | -0.0022           |
| 6   | 3     | 4     | 5    | 3      | 3      | 5007.4536   | -0.0005           |
| 6   | 4     | 3     | 5    | 4      | 2      | 5012.7702   | -0.0034           |
| 6   | 4     | 2     | 5    | 4      | 1      | 5018.8713   | 0.0013            |
| 6   | 1     | 5     | 5    | 1      | 4      | 5068.3091   | 0.0014            |
| 6   | 2     | 4     | 5    | 2      | 3      | 5237.9585   | 0.0020            |
| 7   | 1     | 7     | 6    | 1      | 6      | 5289.2944   | 0.0002            |
| 7   | 2     | 6     | 6    | 2      | 5      | 5651.8123   | 0.0006            |
| 7   | 1     | 6     | 6    | 1      | 5      | 5813.6394   | 0.0021            |
| 7   | 3     | 5     | 6    | 3      | 4      | 5835.4083   | 0.0002            |
| 7   | 5     | 3     | 6    | 5      | 2      | 5843.7417   | 0.0012            |
| 7   | 5     | 2     | 6    | 5      | 1      | 5844.5168   | 0.0006            |
| 7   | 4     | 3     | 6    | 4      | 2      | 5880.3649   | 0.0001            |
| 7   | 3     | 4     | 6    | 3      | 3      | 6015.4274   | -0.0002           |
| 8   | 1     | 8     | 7    | 1      | 7      | 6018.3738   | -0.0011           |
| 8   | 0     | 8     | 7    | 0      | 7      | 6026.9044   | -0.0027           |

|   |   |   |   |   |   |           |         |
|---|---|---|---|---|---|-----------|---------|
| 7 | 2 | 5 | 6 | 2 | 4 | 6106.7985 | 0.0000  |
| 8 | 2 | 7 | 7 | 2 | 6 | 6411.8332 | -0.0006 |
| 8 | 1 | 7 | 7 | 1 | 6 | 6530.4023 | -0.0018 |
| 9 | 1 | 9 | 8 | 1 | 8 | 6745.4261 | -0.0002 |
| 9 | 0 | 9 | 8 | 0 | 8 | 6749.4441 | 0.0024  |
| 8 | 4 | 4 | 7 | 4 | 3 | 6760.1378 | 0.0003  |

**Table S2.10.** II-2W-1/2/3 (OH-DOH-HOH) assigned transitions, along with their frequencies and deviation from the calculated value ( $\Delta\nu = \nu - \nu_{\text{calc}}$ ).

| $J$ | $K_a$ | $K_c$ | $J'$ | $K_a'$ | $K_c'$ | $\nu$ / MHz | $\Delta\nu$ / MHz |
|-----|-------|-------|------|--------|--------|-------------|-------------------|
| 4   | 1     | 4     | 3    | 1      | 3      | 3084.6268   | -0.0018           |
| 4   | 0     | 4     | 3    | 0      | 3      | 3164.8617   | 0.0048            |
| 4   | 2     | 3     | 3    | 2      | 2      | 3304.8877   | -0.0020           |
| 4   | 2     | 2     | 3    | 2      | 1      | 3458.8783   | 0.0044            |
| 5   | 1     | 5     | 4    | 1      | 4      | 3833.4258   | 0.0008            |
| 5   | 0     | 5     | 4    | 0      | 4      | 3887.9162   | 0.0002            |
| 5   | 2     | 4     | 4    | 2      | 3      | 4108.8009   | 0.0044            |
| 5   | 3     | 3     | 4    | 3      | 2      | 4192.4745   | -0.0014           |
| 5   | 3     | 2     | 4    | 3      | 1      | 4232.3966   | 0.0019            |
| 5   | 2     | 3     | 4    | 2      | 2      | 4368.1648   | 0.0025            |
| 6   | 1     | 6     | 5    | 1      | 5      | 4574.2612   | -0.0011           |
| 6   | 0     | 6     | 5    | 0      | 5      | 4605.7588   | 0.0004            |
| 6   | 2     | 5     | 5    | 2      | 4      | 4899.0667   | -0.0010           |
| 6   | 3     | 4     | 5    | 3      | 3      | 5031.6748   | -0.0012           |
| 6   | 4     | 3     | 5    | 4      | 2      | 5037.8756   | 0.0009            |
| 6   | 4     | 2     | 5    | 4      | 1      | 5044.4527   | -0.0055           |
| 6   | 1     | 5     | 5    | 1      | 4      | 5087.7532   | -0.0020           |
| 6   | 3     | 3     | 5    | 3      | 2      | 5128.8601   | -0.0027           |
| 6   | 2     | 4     | 5    | 2      | 3      | 5265.2496   | -0.0037           |
| 7   | 1     | 7     | 6    | 1      | 6      | 5309.4756   | -0.0002           |
| 7   | 2     | 6     | 6    | 2      | 5      | 5674.9381   | -0.0020           |
| 7   | 1     | 6     | 6    | 1      | 5      | 5833.5755   | -0.0017           |
| 7   | 3     | 5     | 6    | 3      | 4      | 5862.9244   | -0.0001           |
| 7   | 5     | 3     | 6    | 5      | 2      | 5872.9902   | -0.0046           |
| 7   | 4     | 3     | 6    | 4      | 2      | 5911.3836   | 0.0088            |
| 7   | 3     | 4     | 6    | 3      | 3      | 6050.5993   | -0.0010           |
| 7   | 2     | 5     | 6    | 2      | 4      | 6136.3222   | 0.0014            |
| 8   | 1     | 7     | 7    | 1      | 6      | 6551.5081   | 0.0015            |
| 9   | 1     | 9     | 8    | 1      | 8      | 6770.9403   | -0.0007           |
| 9   | 0     | 9     | 8    | 0      | 8      | 6774.6446   | 0.0011            |
| 8   | 2     | 6     | 7    | 2      | 5      | 6972.0505   | 0.0015            |

**Table S2.11.** II-2W-1/2/3 (OH-HOH-DOH) assigned transitions, along with their frequencies and deviation from the calculated value ( $\Delta v = v - v_{\text{calc}}$ ).

| $J$ | $K_a$ | $K_c$ | $J'$ | $K_a'$ | $K_c'$ | $v$ / MHz | $\Delta v$ / MHz |
|-----|-------|-------|------|--------|--------|-----------|------------------|
| 3   | 1     | 3     | 2    | 1      | 2      | 2323.0253 | -0.0007          |
| 3   | 0     | 3     | 2    | 0      | 2      | 2417.8376 | 0.0024           |
| 3   | 2     | 2     | 2    | 2      | 1      | 2482.2957 | 0.0056           |
| 4   | 1     | 4     | 3    | 1      | 3      | 3081.4440 | 0.0030           |
| 4   | 0     | 4     | 3    | 0      | 3      | 3163.9720 | 0.0030           |
| 4   | 2     | 3     | 3    | 2      | 2      | 3296.5160 | 0.0027           |
| 4   | 3     | 2     | 3    | 3      | 1      | 3338.6727 | -0.0012          |
| 4   | 3     | 1     | 3    | 3      | 0      | 3349.3402 | 0.0025           |
| 4   | 2     | 2     | 3    | 2      | 1      | 3442.0994 | 0.0036           |
| 5   | 1     | 5     | 4    | 1      | 4      | 3830.5060 | -0.0063          |
| 5   | 0     | 5     | 4    | 0      | 4      | 3888.2436 | 0.0029           |
| 5   | 4     | 1     | 4    | 4      | 0      | 4175.7758 | -0.0042          |
| 5   | 3     | 3     | 4    | 3      | 2      | 4178.6244 | 0.0071           |
| 5   | 3     | 2     | 4    | 3      | 1      | 4214.3720 | 0.0001           |
| 5   | 1     | 4     | 4    | 1      | 3      | 4293.0320 | 0.0006           |
| 5   | 2     | 3     | 4    | 2      | 2      | 4347.3920 | -0.0023          |
| 6   | 1     | 6     | 5    | 1      | 5      | 4571.7510 | -0.0007          |
| 6   | 0     | 6     | 5    | 0      | 5      | 4606.1440 | 0.0031           |
| 6   | 2     | 5     | 5    | 2      | 4      | 4890.1880 | -0.0009          |
| 6   | 3     | 4     | 5    | 3      | 3      | 5015.7400 | -0.0002          |
| 6   | 4     | 3     | 5    | 4      | 2      | 5020.1420 | -0.0040          |
| 6   | 4     | 2     | 5    | 4      | 1      | 5025.7450 | -0.0031          |
| 6   | 1     | 5     | 5    | 1      | 4      | 5081.7410 | -0.0002          |
| 6   | 3     | 3     | 5    | 3      | 2      | 5103.5580 | -0.0004          |
| 7   | 1     | 7     | 6    | 1      | 6      | 5307.3120 | -0.0008          |
| 7   | 0     | 7     | 6    | 0      | 6      | 5325.7290 | 0.0023           |
| 7   | 2     | 6     | 6    | 2      | 5      | 5666.8790 | -0.0041          |
| 7   | 1     | 6     | 6    | 1      | 5      | 5832.2700 | -0.0037          |
| 7   | 3     | 5     | 6    | 3      | 4      | 5845.8490 | -0.0036          |
| 7   | 5     | 2     | 6    | 5      | 1      | 5853.0729 | 0.0024           |
| 7   | 4     | 4     | 6    | 4      | 3      | 5869.2390 | 0.0000           |
| 7   | 4     | 3     | 6    | 4      | 2      | 5887.1910 | -0.0047          |
| 7   | 3     | 4     | 6    | 3      | 3      | 6017.7760 | -0.0020          |
| 8   | 1     | 8     | 7    | 1      | 7      | 6039.2320 | -0.0048          |
| 8   | 0     | 8     | 7    | 0      | 7      | 6048.4360 | -0.0039          |
| 7   | 2     | 5     | 6    | 2      | 4      | 6115.1450 | -0.0001          |
| 8   | 1     | 7     | 7    | 1      | 6      | 6553.5909 | 0.0030           |
| 8   | 5     | 4     | 7    | 5      | 3      | 6702.0517 | 0.0017           |
| 8   | 5     | 3     | 7    | 5      | 2      | 6704.7607 | -0.0003          |

|   |   |   |   |   |   |           |         |
|---|---|---|---|---|---|-----------|---------|
| 8 | 4 | 4 | 7 | 4 | 3 | 6765.9492 | 0.0073  |
| 9 | 1 | 9 | 8 | 1 | 8 | 6769.0658 | 0.0064  |
| 9 | 0 | 9 | 8 | 0 | 8 | 6773.4504 | -0.0009 |

**Table S2.12.** II-2W-1/2/3 (OH-HOD-HOH) assigned transitions, along with their frequencies and deviation from the calculated value ( $\Delta v = v - v_{\text{calc}}$ ).

| $J$ | $K_a$ | $K_c$ | $J'$ | $K_a'$ | $K_c'$ | $v$ / MHz | $\Delta v$ / MHz |
|-----|-------|-------|------|--------|--------|-----------|------------------|
| 3   | 1     | 3     | 2    | 1      | 2      | 2317.4076 | -0.0062          |
| 3   | 1     | 2     | 2    | 1      | 1      | 2627.0759 | -0.0036          |
| 4   | 0     | 4     | 3    | 0      | 3      | 3149.5426 | 0.0057           |
| 4   | 2     | 3     | 3    | 2      | 2      | 3297.5448 | 0.0036           |
| 4   | 2     | 2     | 3    | 2      | 1      | 3460.5002 | -0.0026          |
| 5   | 1     | 5     | 4    | 1      | 4      | 3816.4689 | -0.0005          |
| 5   | 0     | 5     | 4    | 0      | 4      | 3867.4895 | -0.0036          |
| 5   | 2     | 4     | 4    | 2      | 3      | 4098.0129 | 0.0019           |
| 5   | 1     | 4     | 4    | 1      | 3      | 4291.6698 | 0.0044           |
| 5   | 2     | 3     | 4    | 2      | 2      | 4369.6344 | 0.0014           |
| 6   | 1     | 6     | 5    | 1      | 5      | 4552.9079 | 0.0045           |
| 6   | 0     | 6     | 5    | 0      | 5      | 4581.4599 | 0.0036           |
| 6   | 2     | 5     | 5    | 2      | 4      | 4883.9999 | 0.0018           |
| 6   | 3     | 4     | 5    | 3      | 3      | 5024.1684 | 0.0014           |
| 6   | 4     | 3     | 5    | 4      | 2      | 5032.5036 | -0.0018          |
| 6   | 4     | 2     | 5    | 4      | 1      | 5040.2865 | -0.0041          |
| 7   | 1     | 7     | 6    | 1      | 6      | 5283.7883 | -0.0084          |
| 7   | 0     | 7     | 6    | 0      | 6      | 5298.2001 | -0.0003          |
| 7   | 2     | 6     | 6    | 2      | 5      | 5654.8783 | -0.0046          |
| 7   | 1     | 6     | 6    | 1      | 5      | 5805.6995 | -0.0037          |
| 7   | 3     | 5     | 6    | 3      | 4      | 5852.3849 | 0.0020           |
| 7   | 5     | 3     | 6    | 5      | 2      | 5866.6949 | -0.0016          |
| 7   | 5     | 2     | 6    | 5      | 1      | 5867.7684 | 0.0038           |
| 7   | 4     | 4     | 6    | 4      | 3      | 5884.4963 | 0.0036           |
| 7   | 4     | 3     | 6    | 4      | 2      | 5909.2131 | -0.0027          |
| 8   | 1     | 8     | 7    | 1      | 7      | 6011.3509 | 0.0046           |

**Table S2.13.** II-2W-1/2/3 (OH-DOH-DOH) assigned transitions, along with their frequencies and deviation from the calculated value ( $\Delta v = v - v_{\text{calc}}$ ).

| $J$ | $K_a$ | $K_c$ | $J'$ | $K_a'$ | $K_c'$ | $v$ / MHz | $\Delta v$ / MHz |
|-----|-------|-------|------|--------|--------|-----------|------------------|
| 3   | 1     | 3     | 2    | 1      | 2      | 2307.5772 | 0.0052           |
| 3   | 0     | 3     | 2    | 0      | 2      | 2402.0377 | -0.0004          |
| 4   | 1     | 4     | 3    | 1      | 3      | 3060.2757 | 0.0032           |



|   |   |   |   |   |   |           |         |
|---|---|---|---|---|---|-----------|---------|
| 4 | 0 | 4 | 3 | 0 | 3 | 3141.2895 | -0.0030 |
| 4 | 2 | 3 | 3 | 2 | 2 | 3278.2478 | -0.0025 |
| 4 | 2 | 2 | 3 | 2 | 1 | 3428.7865 | 0.0004  |
| 4 | 1 | 3 | 3 | 1 | 2 | 3452.2395 | 0.0006  |
| 5 | 1 | 5 | 4 | 1 | 4 | 3803.4262 | 0.0060  |
| 5 | 0 | 5 | 4 | 0 | 4 | 3859.0753 | -0.0035 |
| 5 | 2 | 4 | 4 | 2 | 3 | 4076.0961 | 0.0064  |
| 5 | 3 | 3 | 4 | 3 | 2 | 4157.7908 | 0.0081  |
| 5 | 3 | 2 | 4 | 3 | 1 | 4196.0047 | -0.0039 |
| 6 | 1 | 6 | 5 | 1 | 5 | 4538.6662 | 0.0023  |
| 6 | 0 | 6 | 5 | 0 | 5 | 4571.2106 | -0.0001 |
| 6 | 2 | 5 | 5 | 2 | 4 | 4860.6063 | -0.0083 |
| 6 | 3 | 4 | 5 | 3 | 3 | 4990.3189 | -0.0010 |
| 6 | 4 | 3 | 5 | 4 | 2 | 4995.7913 | -0.0054 |
| 6 | 4 | 2 | 5 | 4 | 1 | 5001.9813 | 0.0029  |
| 6 | 1 | 5 | 5 | 1 | 4 | 5050.2127 | -0.0042 |
| 6 | 3 | 3 | 5 | 3 | 2 | 5083.7092 | 0.0005  |
| 6 | 2 | 4 | 5 | 2 | 3 | 5221.2073 | -0.0013 |
| 7 | 1 | 7 | 6 | 1 | 6 | 5268.2657 | -0.0004 |
| 7 | 0 | 7 | 6 | 0 | 6 | 5285.3865 | -0.0004 |
| 5 | 2 | 3 | 4 | 1 | 3 | 5391.4943 | -0.0014 |
| 4 | 3 | 2 | 3 | 2 | 2 | 5482.6256 | 0.0019  |
| 7 | 2 | 6 | 6 | 2 | 5 | 5631.0165 | -0.0016 |
| 7 | 1 | 6 | 6 | 1 | 5 | 5792.0859 | -0.0059 |
| 7 | 3 | 5 | 6 | 3 | 4 | 5815.2833 | -0.0002 |
| 7 | 5 | 3 | 6 | 5 | 2 | 5823.9233 | -0.0037 |
| 7 | 5 | 2 | 6 | 5 | 1 | 5824.7187 | 0.0016  |
| 7 | 4 | 4 | 6 | 4 | 3 | 5841.0899 | 0.0012  |
| 7 | 4 | 3 | 6 | 4 | 2 | 5860.8512 | -0.0012 |
| 7 | 3 | 4 | 6 | 3 | 3 | 5996.5959 | 0.0005  |
| 8 | 0 | 8 | 7 | 0 | 7 | 6002.7316 | 0.0012  |
| 7 | 2 | 5 | 6 | 2 | 4 | 6086.8254 | 0.0030  |
| 8 | 2 | 7 | 7 | 2 | 6 | 6387.8867 | -0.0022 |
| 8 | 1 | 7 | 7 | 1 | 6 | 6505.5557 | 0.0051  |
| 8 | 4 | 5 | 7 | 4 | 4 | 6687.4124 | 0.0048  |
| 9 | 1 | 9 | 8 | 1 | 8 | 6718.3523 | -0.0003 |
| 9 | 0 | 9 | 8 | 0 | 8 | 6722.3027 | 0.0002  |
| 8 | 2 | 6 | 7 | 2 | 5 | 6918.2531 | -0.0022 |
| 8 | 3 | 5 | 7 | 3 | 4 | 6921.1744 | 0.0013  |

---

**Table S3.1.** Experimental spectroscopic constants for the PhTFE(OH) II···DOD species.<sup>a</sup>

| Constants           | (OH) II···DOD |
|---------------------|---------------|
| A/ MHz              | 1048.1823(81) |
| B/ MHz              | 557.13058(46) |
| C/ MHz              | 453.70015(38) |
| $\Delta_K$ / kHz    | [0. 9052]     |
| $\Delta_{JK}$ / kHz | 0.105(25)     |
| $\Delta_J$ / kHz    | 0.0254(51)    |
| $\delta_K$ / kHz    | [-0.0703]     |
| $\delta_J$ / kHz    | [0.00839]     |
| $\sigma$ / kHz      | 3.8           |
| $N$                 | 22            |

<sup>a</sup> Standard errors in units of the least significant digit can be found enclosed within parentheses next to their respective fit parameter. The quartic centrifugal distortion constants within square parentheses were held fixed at the B3LYP-D3BJ/def2-TZVPD predicted values of the parent species (see reference 7).  $\sigma$  is the standard deviation of the fit in kHz and  $N$  is the number of rotational transitions included in the fit.

**Table S3.2.** PhTFE(OH) II···DOD assigned transitions, along with their frequencies and deviation from the calculated value ( $\Delta\nu = \nu - \nu_{\text{calc}}$ ).

| $J$ | $K_a$ | $K_c$ | $J'$ | $K_a'$ | $K_c'$ | $\nu$ / MHz | $\Delta\nu$ / MHz |
|-----|-------|-------|------|--------|--------|-------------|-------------------|
| 3   | 1     | 3     | 2    | 1      | 2      | 2868.7415   | 0.0050            |
| 4   | 1     | 4     | 3    | 1      | 3      | 3810.6248   | -0.0075           |
| 4   | 2     | 3     | 3    | 2      | 2      | 4031.8317   | -0.0033           |
| 4   | 3     | 1     | 3    | 3      | 0      | 4076.9473   | 0.0086            |
| 4   | 2     | 2     | 3    | 2      | 1      | 4163.6471   | 0.0046            |
| 5   | 1     | 5     | 4    | 1      | 4      | 4743.5199   | 0.0013            |
| 5   | 0     | 5     | 4    | 0      | 4      | 4821.4644   | -0.0024           |
| 5   | 2     | 4     | 4    | 2      | 3      | 5021.5631   | 0.0007            |
| 5   | 3     | 3     | 4    | 3      | 2      | 5092.2921   | 0.0019            |
| 5   | 3     | 2     | 4    | 3      | 1      | 5118.8128   | -0.0045           |
| 5   | 1     | 4     | 4    | 1      | 3      | 5234.1288   | -0.0012           |
| 6   | 1     | 6     | 5    | 1      | 5      | 5668.2971   | -0.0034           |
| 6   | 0     | 6     | 5    | 0      | 5      | 5719.9257   | -0.0036           |
| 6   | 2     | 5     | 5    | 2      | 4      | 5999.7968   | 0.0004            |
| 6   | 4     | 3     | 5    | 4      | 2      | 6113.8019   | 0.0005            |
| 6   | 3     | 4     | 5    | 3      | 3      | 6114.2948   | -0.0013           |
| 6   | 4     | 2     | 5    | 4      | 1      | 6117.2427   | -0.0033           |
| 6   | 3     | 3     | 5    | 3      | 2      | 6181.1692   | -0.0012           |
| 6   | 1     | 5     | 5    | 1      | 4      | 6221.9334   | 0.0029            |
| 6   | 2     | 4     | 5    | 2      | 3      | 6341.3815   | -0.0032           |
| 7   | 0     | 7     | 6    | 0      | 6      | 6617.3163   | 0.0075            |
| 7   | 1     | 6     | 6    | 1      | 5      | 7173.7123   | -0.0008           |
| 3   | 1     | 3     | 2    | 1      | 2      | 2868.7415   | 0.0050            |

|   |   |   |   |   |   |           |         |
|---|---|---|---|---|---|-----------|---------|
| 4 | 1 | 4 | 3 | 1 | 3 | 3810.6248 | -0.0075 |
| 4 | 2 | 3 | 3 | 2 | 2 | 4031.8317 | -0.0033 |
| 4 | 3 | 1 | 3 | 3 | 0 | 4076.9473 | 0.0086  |
| 4 | 2 | 2 | 3 | 2 | 1 | 4163.6471 | 0.0046  |
| 5 | 1 | 5 | 4 | 1 | 4 | 4743.5199 | 0.0013  |
| 5 | 0 | 5 | 4 | 0 | 4 | 4821.4644 | -0.0024 |
| 5 | 2 | 4 | 4 | 2 | 3 | 5021.5631 | 0.0007  |
| 5 | 3 | 3 | 4 | 3 | 2 | 5092.2921 | 0.0019  |
| 5 | 3 | 2 | 4 | 3 | 1 | 5118.8128 | -0.0045 |
| 5 | 1 | 4 | 4 | 1 | 3 | 5234.1288 | -0.0012 |
| 6 | 1 | 6 | 5 | 1 | 5 | 5668.2971 | -0.0034 |
| 6 | 0 | 6 | 5 | 0 | 5 | 5719.9257 | -0.0036 |
| 6 | 2 | 5 | 5 | 2 | 4 | 5999.7968 | 0.0004  |
| 6 | 4 | 3 | 5 | 4 | 2 | 6113.8019 | 0.0005  |
| 6 | 3 | 4 | 5 | 3 | 3 | 6114.2948 | -0.0013 |
| 6 | 4 | 2 | 5 | 4 | 1 | 6117.2427 | -0.0033 |
| 6 | 3 | 3 | 5 | 3 | 2 | 6181.1692 | -0.0012 |
| 6 | 1 | 5 | 5 | 1 | 4 | 6221.9334 | 0.0029  |
| 6 | 2 | 4 | 5 | 2 | 3 | 6341.3815 | -0.0032 |
| 7 | 0 | 7 | 6 | 0 | 6 | 6617.3163 | 0.0075  |
| 7 | 1 | 6 | 6 | 1 | 5 | 7173.7123 | -0.0008 |

**Table S4.** Predicted rotational and quartic centrifugal distortion constants for **II-2W-1**, **II-2W-2**, and **II-2W-3** calculated at the B3LYP-D3BJ/def2-TZVPPD level of theory along with the experimental constants for **II-2W-1/2/3**.

| Constants           | Experiment      | B3LYP-D3BJ |         |         |
|---------------------|-----------------|------------|---------|---------|
|                     | II-2W-1/2/3     | II-2W-1    | II-2W-2 | II-2W-3 |
| $A$ / MHz           | 851.12402(20)   | 852.8      | 856.8   | 864.8   |
| $B$ / MHz           | 467.4997798(79) | 468.6      | 464.8   | 468.0   |
| $C$ / MHz           | 366.804747(82)  | 364.4      | 366.4   | 368.5   |
| $\Delta_K$ / kHz    | 0.520(12)       | 0.537      | 0.605   | 0.546   |
| $\Delta_{JK}$ / kHz | -0.0766(16)     | -0.111     | -0.132  | -0.121  |
| $\Delta_J$ / kHz    | 0.03740(63)     | 0.040      | 0.038   | 0.042   |
| $\delta_K$ / kHz    | [0.008694]      | 0.009      | -0.014  | 0.013   |
| $\delta_J$ / kHz    | 0.01038(28)     | 0.013      | 0.012   | 0.014   |

**Table S5.** Comparison of the calculated Cartesian coordinates in the principal axis system for **II-2W-1**, **II-2W-2**, and **II-2W-3** with the experimental substitution coordinates for **II-2W-1/2/3** obtained from the isotopic substitution analysis for multiply substituted species. In this table, single, and double isotopically substituted species were used as the parent species for the Kraitchman analysis of doubly and triply substituted species, respectively.<sup>a</sup>

| Parent Species    | Substituted Species | Experimental Substitution Coordinates |                    |                       |
|-------------------|---------------------|---------------------------------------|--------------------|-----------------------|
|                   |                     | <i>a</i>                              | <i>b</i>           | <i>c</i>              |
| D13               | H21                 | -1.9383(9)                            | 2.6206(7)          | -0.384(5)             |
|                   | H24                 | -3.1989(5)                            | 0.885(2)           | 1.015*i(2)            |
| D21               | H13                 | 0.546(4)                              | 2.1662(9)          | 0.474(4)              |
|                   | H24                 | -3.1979(5)                            | 0.959(2)           | 1.097*i(2)            |
| D24               | H13                 | 0.561(3)                              | 2.1692(8)          | 0.489(3)              |
|                   | H21                 | -1.9412(9)                            | 2.6492(6)          | 0.099*i(17)           |
| D21 and D24       | H13                 | 0.546(3)                              | 2.1585(8)          | 0.486(4)              |
| <sup>18</sup> O20 | O23                 | -3.4370(1)                            | 1.3123(4)          | -0.215(2)             |
| <sup>18</sup> O23 | O20                 | -1.2361(5)                            | 3.0763(2)          | -0.194(3)             |
| Parent Species    | Substituted Species | II-2W-1/2/3 Predicted Coordinates     |                    |                       |
|                   |                     | <i>a</i>                              | <i>b</i>           | <i>c</i>              |
| D13               | H21                 | -2.09 / -2.10 / -2.03                 | 2.58 / 2.54 / 2.59 | -0.27 / -0.22 / -0.21 |
|                   | H24                 | -3.03 / -2.99 / -3.10                 | 0.63 / 0.48 / 0.63 | 0.41 / -0.71 / -0.52  |
| D21               | H13                 | 0.13 / 0.15 / 0.48                    | 2.27 / 2.25 / 2.26 | 0.30 / 0.48 / 0.50    |
|                   | H24                 | -3.03 / -2.99 / -3.10                 | 0.63 / 0.48 / 0.63 | 0.41 / -0.71 / -0.52  |
| D24               | H13                 | 0.13 / 0.15 / 0.48                    | 2.27 / 2.25 / 2.26 | 0.30 / 0.48 / 0.50    |
|                   | H21                 | -2.09 / -2.10 / -2.03                 | 2.58 / 2.54 / 2.59 | -0.27 / -0.22 / -0.21 |
| D21 and D24       | H13                 | 0.13 / 0.15 / 0.48                    | 2.27 / 2.25 / 2.26 | 0.30 / 0.48 / 0.50    |
| <sup>18</sup> O20 | O23                 | -3.43 / -3.41 / -3.40                 | 1.40 / 1.34 / 1.42 | -0.02 / -0.55 / -0.06 |
| <sup>18</sup> O23 | O20                 | -1.28 / -1.34 / -1.19                 | 3.11 / 3.10 / 3.08 | -0.41 / 0.01 / -0.30  |

<sup>a</sup> Costain errors on experimental values are included in the parentheses next to the coordinate and are in units of the last digit. Coordinates with imaginary numbers indicate that the value is near zero. Theoretical coordinates of **II-2W-1**, **II-2W-2**, and **II-2W-3** in their principal axis orientation in the specific parent species are provided for the three lowest energy structures, where the coordinate for each conformer is separated by a slash. All coordinates are in units of Å.

---

III-2W-12 (slight distortion)

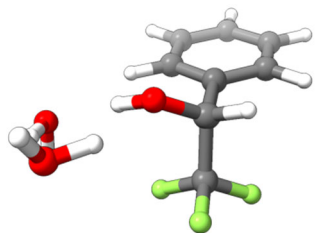

III-2W-15 (significant distortion)

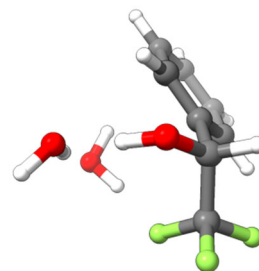

---

**Figure S2.** Sample molecular models showing complexes containing monomeric PhTFE III being only slightly (III-2W-12) and significantly distorted (III-2W-15).

---

PhTFE I

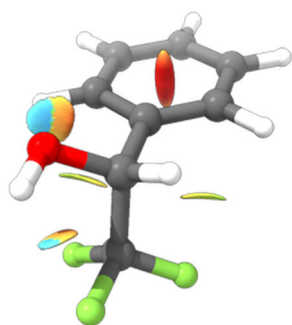

PhTFE II

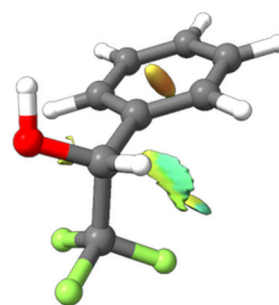

---

I – W1

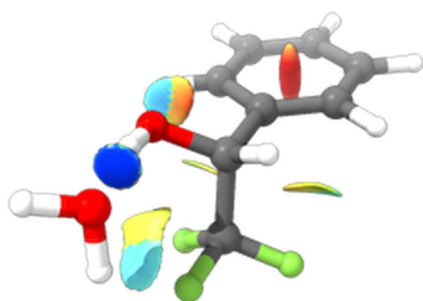

II – W3

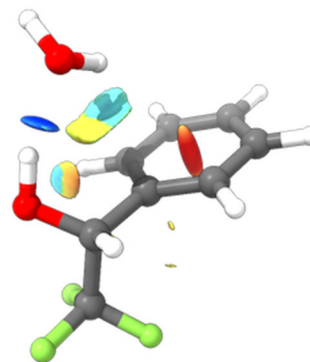

---

**Figure S3.** NCI analyses for the two lowest energy PhTFE monomer conformers and the two most relevant PhTFE monohydrate conformers, calculated at the B3LYP-D3BJ/def2-TZVPPD level of theory. The value (from -0.050 to 0.050) of  $\text{sign}(\lambda_2)\rho$  at a particular point is used to colour the RDG surface (isosurface 0.60). Colour gradient goes from blue (stabilizing) to red (destabilizing), with weak interactions being indicated by green.
